# Supplementary material for: Mechanical cell competition kills cells via induction of lethal p53 levels
Source: PubMed Central journal article supplement (PMC4848481; doi:10.1038/ncomms11373), 2016-04-25
Supplement: ncomms11373-s18.pdf [file ncomms11373-s18.pdf]

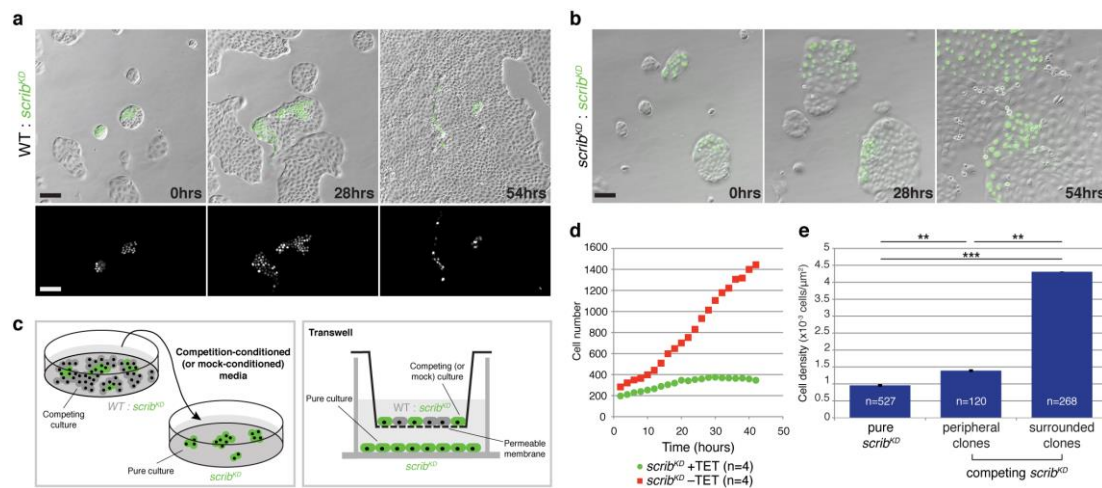

**Supplementary Fig. 1. *scrib<sup>KD</sup>* cells grow more slowly than wild-type cells and are compacted and eliminated when surrounded by wild-type cells.**

**a, b**, Time-course of cell competition assays between unlabelled wild-type (WT) and GFP labelled *scrib<sup>KD</sup>* cells (**a**) and mock competition between unlabelled *scrib<sup>KD</sup>* and GFP labelled *scrib<sup>KD</sup>* cells (**b**), see corresponding Supplementary Movie 1. Inset below (**a**) shows the GFP channel from corresponding stills. **c**, Schematic representation of the experimental set-ups for experiments with competition-conditioned or mock-conditioned medium (as in Fig. 1b) and with transwells (as in Fig. 1c). **d**, Quantification of the growth rate of *scrib<sup>KD</sup>* cells with or without the addition of tetracycline (TET). Each dot represents the average of 4 fields of cells (n). **e**, Average cell density of pure confluent *scrib<sup>KD</sup>* cells and of subconfluent competing *scrib<sup>KD</sup>* cells that are either entirely surrounded by WT cells (surrounded clones) or merely contacting WT clones (peripheral clones). Despite being subconfluent, *scrib<sup>KD</sup>* cells in competing cultures have a higher density than in confluent pure cultures; n = cell number, mean  $\pm$  sem. Scale bars: movie sequences = 100 $\mu\text{m}$  and immunofluorescence images = 50 $\mu\text{m}$  here and throughout all Supplementary Figures. \*\* p<0.005, \*\*\* p<0.0005 by T-test.

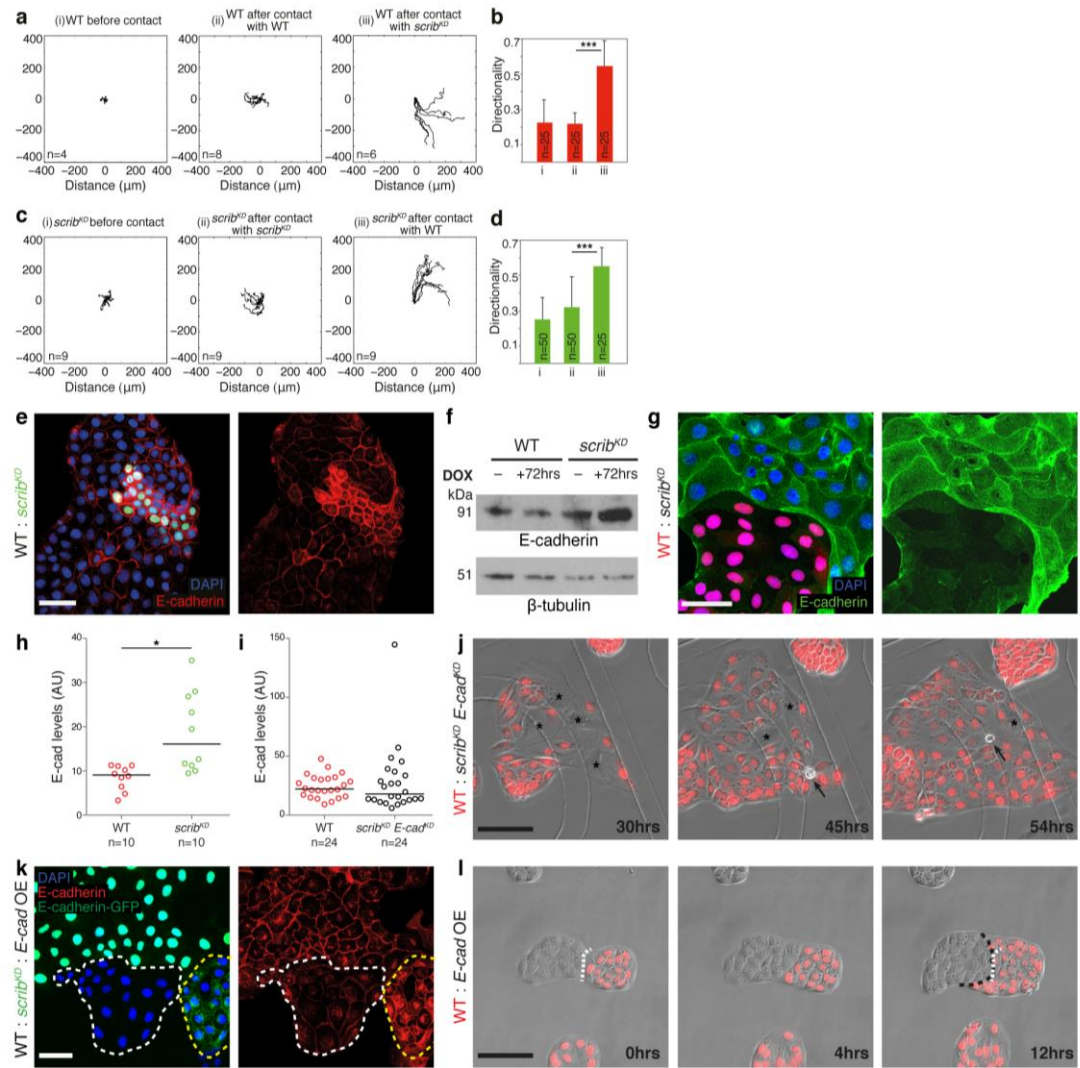

**Supplementary Fig. 2. E-cadherin is upregulated in *scrib*<sup>KD</sup> cells and E-cadherin upregulation is not sufficient to induce directional migration.**

**a-d**, Individual cell trajectories of wild-type (WT) (**a**) or *scrib*<sup>KD</sup> (**c**) cells before or after contact as indicated, and corresponding average directionalities. (**b, d**). Error bars = SD; quantifications from pooled data from 3 biological replicates; \*\*\*  $p < 0.0005$  by T-test. **e**, Anti-E-cadherin staining of co-cultures of WT and GFP labelled *scrib*<sup>KD</sup> cells shows accumulation of E-cadherin in *scrib*<sup>KD</sup> cells compared to WT cells (sum intensity projection). **f**, Western blot against E-cadherin in WT and *scrib*<sup>KD</sup> cells +/- doxycycline (DOX).  $\beta$ -tubulin was used as loading control. **g**, Cell surface E-cadherin staining of RFP labelled WT and unlabelled *scrib*<sup>KD</sup> co-cultures shows surface accumulation of E-cadherin in *scrib*<sup>KD</sup> cells compared to WT cells. **h, i**, Quantification of single cell E-cadherin intensities from one representative set of confocal images as in Fig. 2q, rightmost panel; black bars = median; \*  $p < 0.05$  by KS test. **j**, Stills from time-lapse movie of RFP labelled WT and unlabelled *scrib*<sup>KD</sup> E-cad<sup>KD</sup> co-cultures showing that the latter are still eliminated by WT cells despite lack of contact-induced migration. Asterisks mark individual *scrib*<sup>KD</sup> E-cad<sup>KD</sup> cells; black arrows = cell death events. **k**, Immunofluorescence staining comparing E-cadherin levels between WT cells (within white dashed line), *scrib*<sup>KD</sup> cells with nuclear GFP, and cells overexpressing GFP labelled E-cadherin (E-cad OE; within yellow dashed

line). **1**, Co-culture of RFP labelled WT cells and *E-cad* OE cells shows no directional migration upon contact (white dashed line = initial point of contact; black dashed line = final point of contact). n = number of cells.

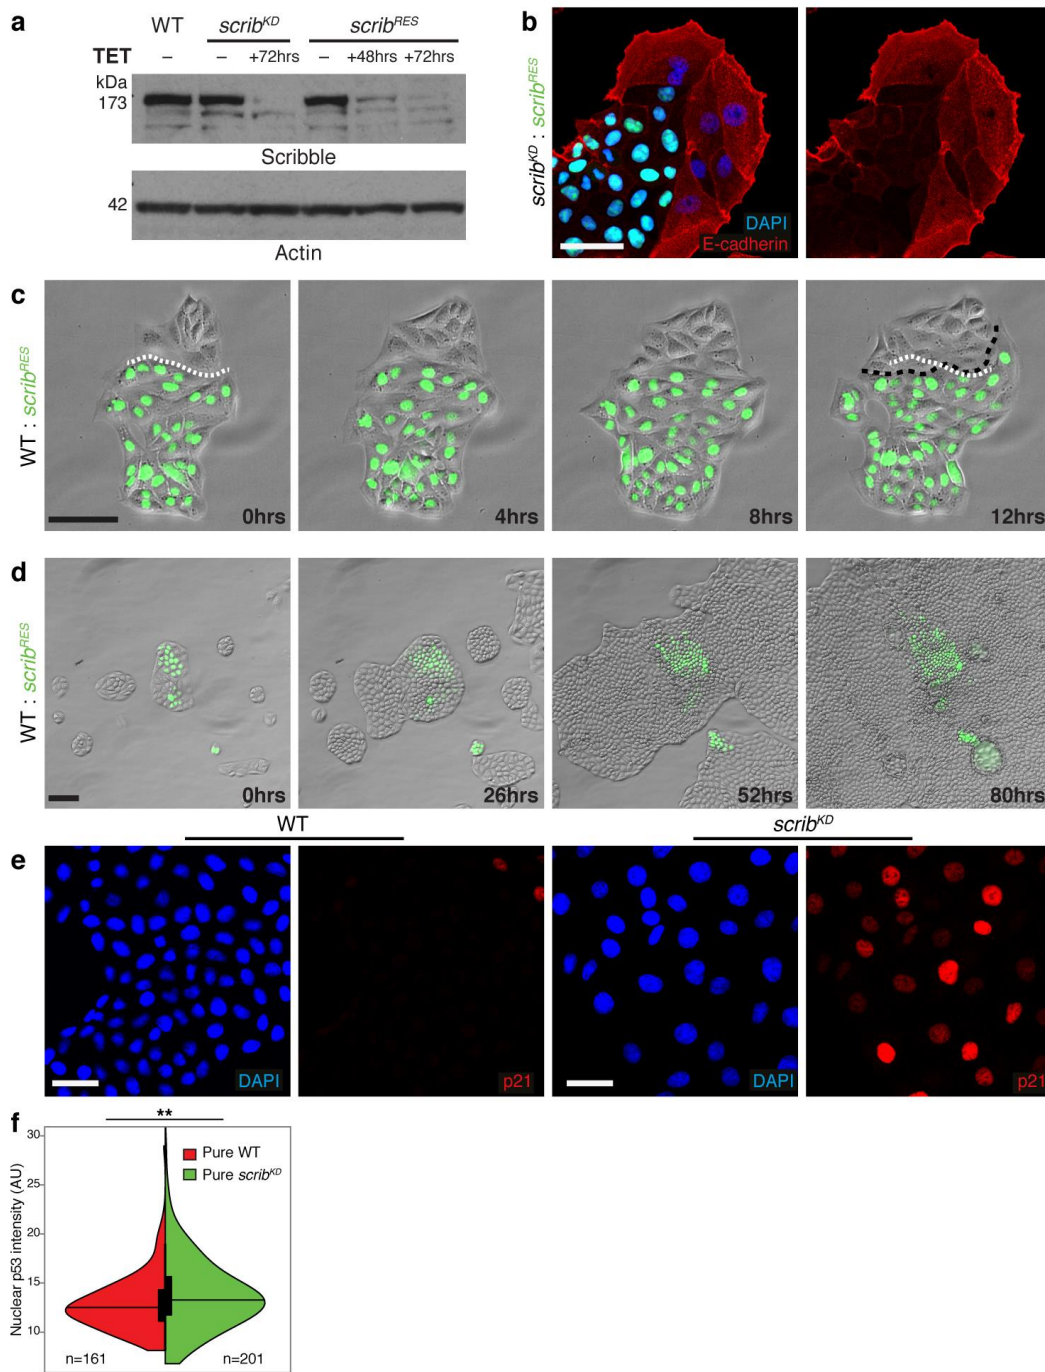

**Supplementary Fig. 3. Characterisation of *scrib<sup>RES</sup>* cells and analysis of p21 and p53 expression in *scrib<sup>KD</sup>* cells.**

**a**, Western blot against Scribble for *scrib<sup>KD</sup>* and *scrib<sup>RES</sup>* cells +/- TET. **b**, Surface E-cadherin staining of GFP labelled *scrib<sup>RES</sup>* cells mixed with unlabelled *scrib<sup>KD</sup>* cells. **c**, **d**, Stills from time-lapse movies of wild-type (WT) and GFP labelled *scrib<sup>RES</sup>* cells to assess directional migration (**c**) and competition (**d**), see corresponding Supplementary Movie 10. White dashed line = initial point of contact; black dashed line = final point of contact. **e**, p21 staining of pure WT cells and pure *scrib<sup>KD</sup>* cells. Note widespread p21 elevation in *scrib<sup>KD</sup>* cells. **f**, Loss of Scribble leads to an overall

increase in nuclear p53 staining. n = cell number; \*\* p<0.005 by Wilcoxon rank sum test.

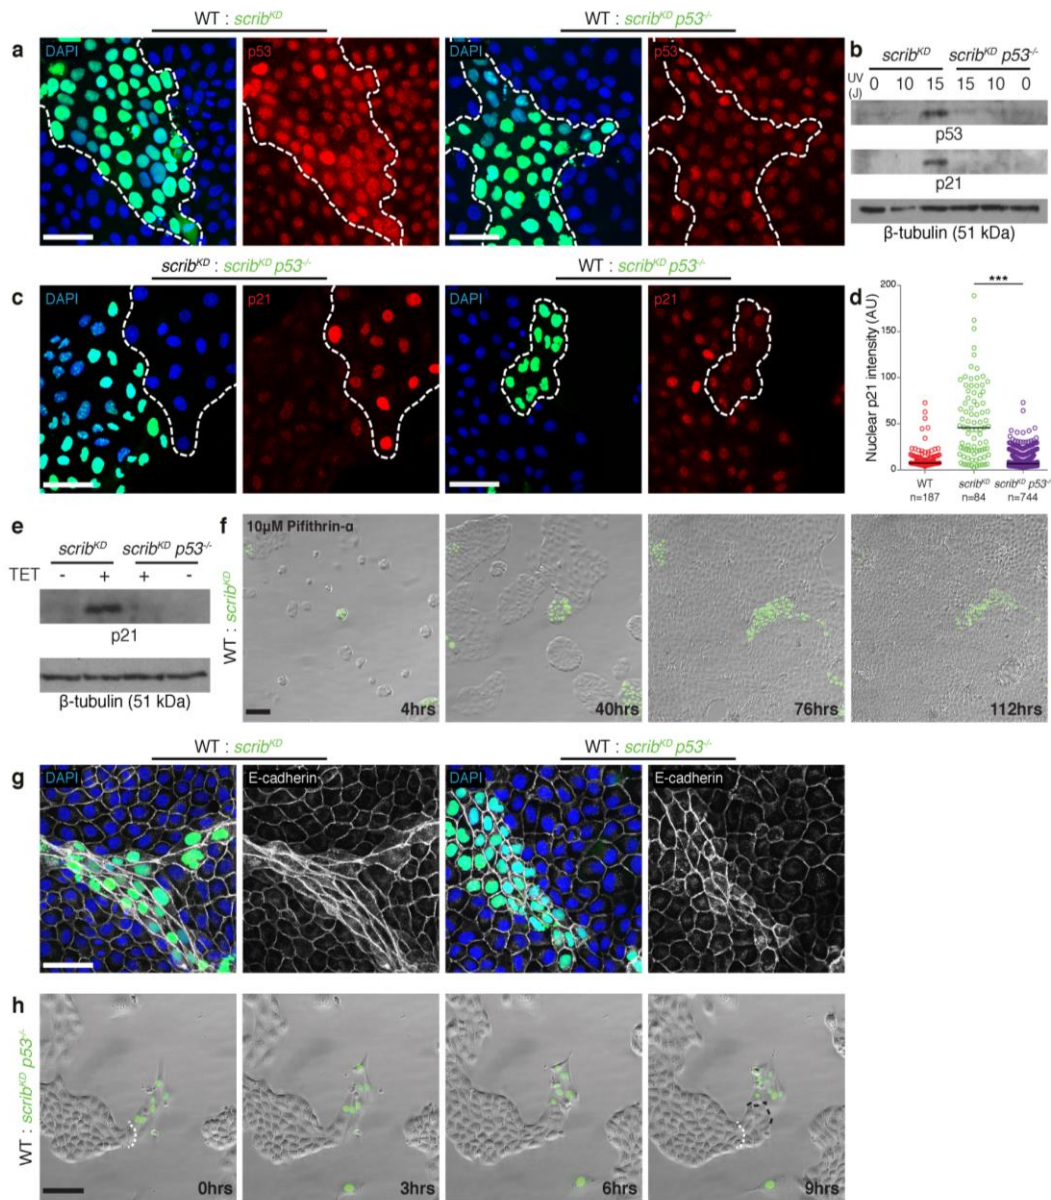

**Supplementary Fig. 4. Loss of p53 activity blocks elimination of *scrib*<sup>KD</sup> cells, but does not prevent up-regulation of E-cadherin or contact-induced migration.**

**a**, Anti-p53 staining of GFP labelled *scrib*<sup>KD</sup> or GFP labelled *scrib*<sup>KD</sup> *p53*<sup>-/-</sup> cells in competition with wild-type (WT) cells. Two fields of similar cell densities are shown for comparison. **b**, Western blot against p53 and p21 in *scrib*<sup>KD</sup> and *scrib*<sup>KD</sup> *p53*<sup>-/-</sup> cells +/- UV-C irradiation; β-tubulin as loading control. **c**, Anti-p21 staining of *scrib*<sup>KD</sup> *p53*<sup>-/-</sup> cells when cultured next to *scrib*<sup>KD</sup> or WT cells (all images are taken from the same coverslip using the fence system). **d**, Single cell nuclear p21 intensity from confocal images as in (c); \*\*\* p<0.0005 by KS test. **e**, Western blot against p21 in *scrib*<sup>KD</sup> and *scrib*<sup>KD</sup> *p53*<sup>-/-</sup> cells +/- TET; β-tubulin as loading control. **f**, Stills from time-lapse movies of WT and GFP labelled *scrib*<sup>KD</sup> competition assays in the presence of Pifithrin-α (10μM). **g**, Anti-E-cadherin staining of GFP labelled *scrib*<sup>KD</sup> or GFP labelled *scrib*<sup>KD</sup> *p53*<sup>-/-</sup> cells co-cultured with WT cells. **h**, Stills from time-lapse movies with WT and GFP labelled *scrib*<sup>KD</sup> *p53*<sup>-/-</sup> cells. n = cell number. 2 independent repeats per experiment for (a, b, d).

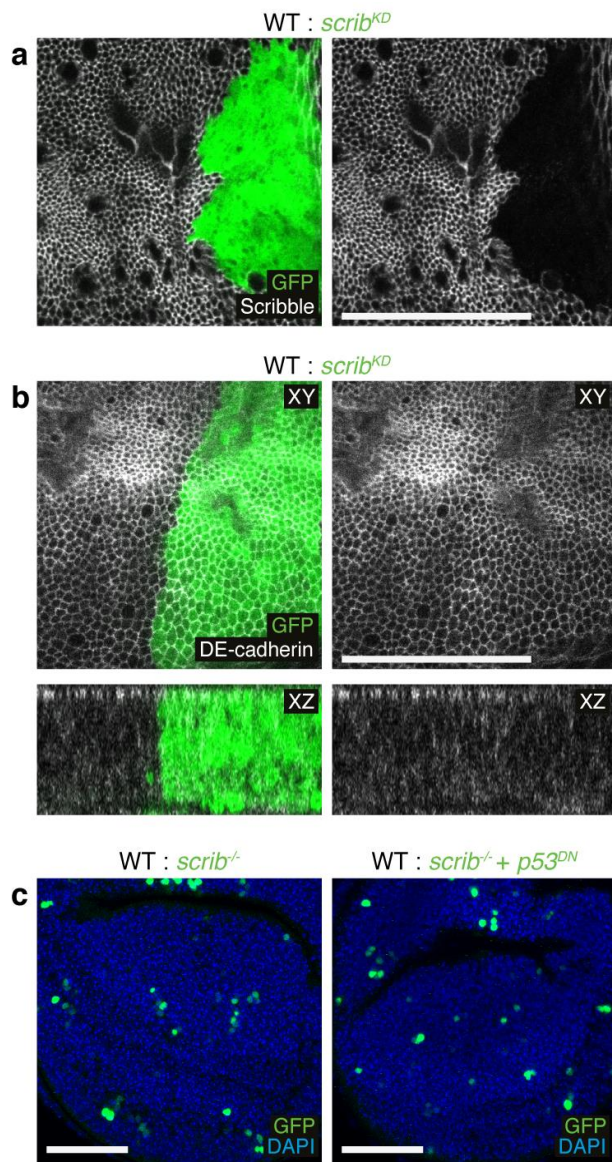

**Supplementary Fig. 5. *scrib*<sup>-/-</sup> clones are eliminated in a p53-independent manner in *Drosophila* wing discs.**

**a**, Scribble immunostaining of *Drosophila* wing disc with GFP labelled clones expressing Scribble RNAi; 1 experimental repeat; n = 6 wing discs. The same result was obtained with several independent drivers. **b**, XY and XZ views of DE-cadherin staining of *Drosophila* wing disc with GFP labelled Scribble RNAi clones. XY view shows average projection of multiple z-sections acquired at the plane of the adherens junctions; 1 experimental repeat; n = 4 wing discs. The same result was obtained with several independent drivers. **c**, Representative images of 48 hour old GFP labelled *scrib*<sup>-/-</sup> clones (control) or *scrib*<sup>-/-</sup> clones overexpressing *p53*<sup>DN</sup>; 2 experimental repeats; n > 3 wing discs per condition/experiment. The same result was obtained with a validated p53RNAi line.

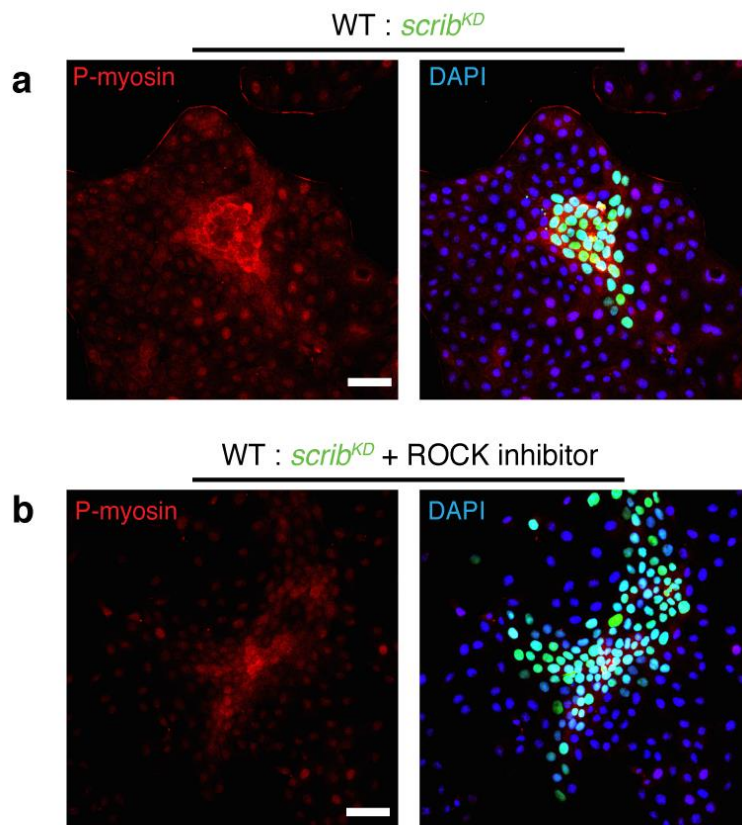

**Supplementary Fig. 6. ROCK is required for P-myosin increase.**

**a, b,** Active P-myosin II (phospho S20) immunofluorescence staining of GFP labelled *scrib*<sup>KD</sup> and unlabelled wild-type (WT) co-cultures without (**a**) or with (**b**) addition of ROCK inhibitor (Y27632).



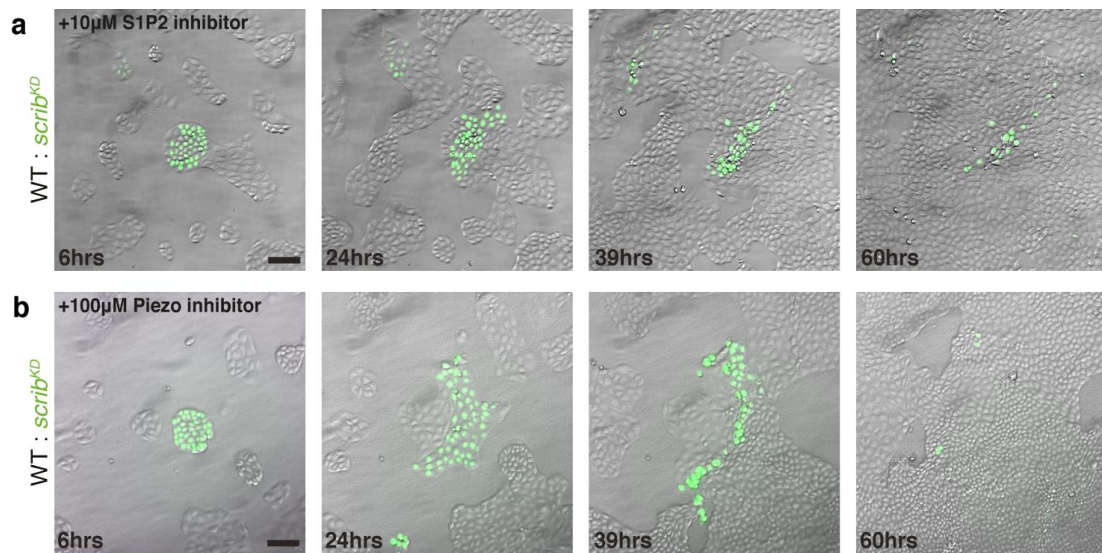

**Supplementary Fig. 7 Neither S1P2 nor Piezo are required for *scrib<sup>KD</sup>* cell elimination.**

**a, b,** Stills from time-lapse movies of WT and *scrib<sup>KD</sup>* co-cultures in the presence of a S1P2 inhibitor (JTE013) (a) or Piezo inhibitor (gadolinium III chloride) (b).

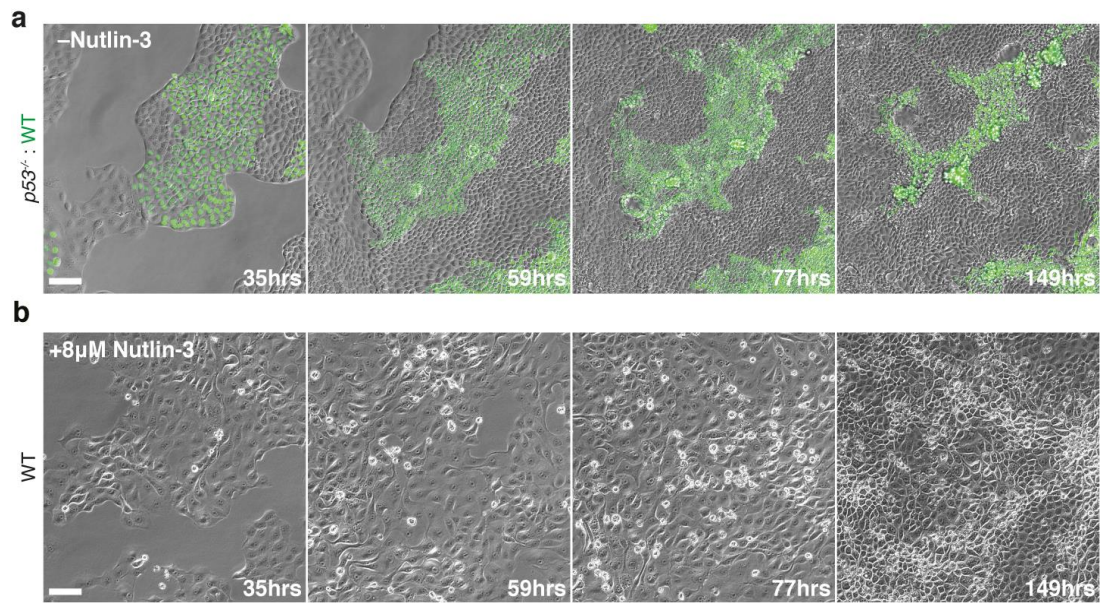

**Supplementary Fig. 8. p53 activation is sufficient to cause flattening of wild-type MDCK cells.**

**a**, Stills from time-lapse movies of co-cultures of GFP labelled wild-type (WT) and unlabelled  $p53^{-/-}$  MDCK cells. **b**, Stills from time-lapse movies of pure WT MDCK cells with Nutlin-3 (8 $\mu$ M, see Supplementary Movie 13 right).

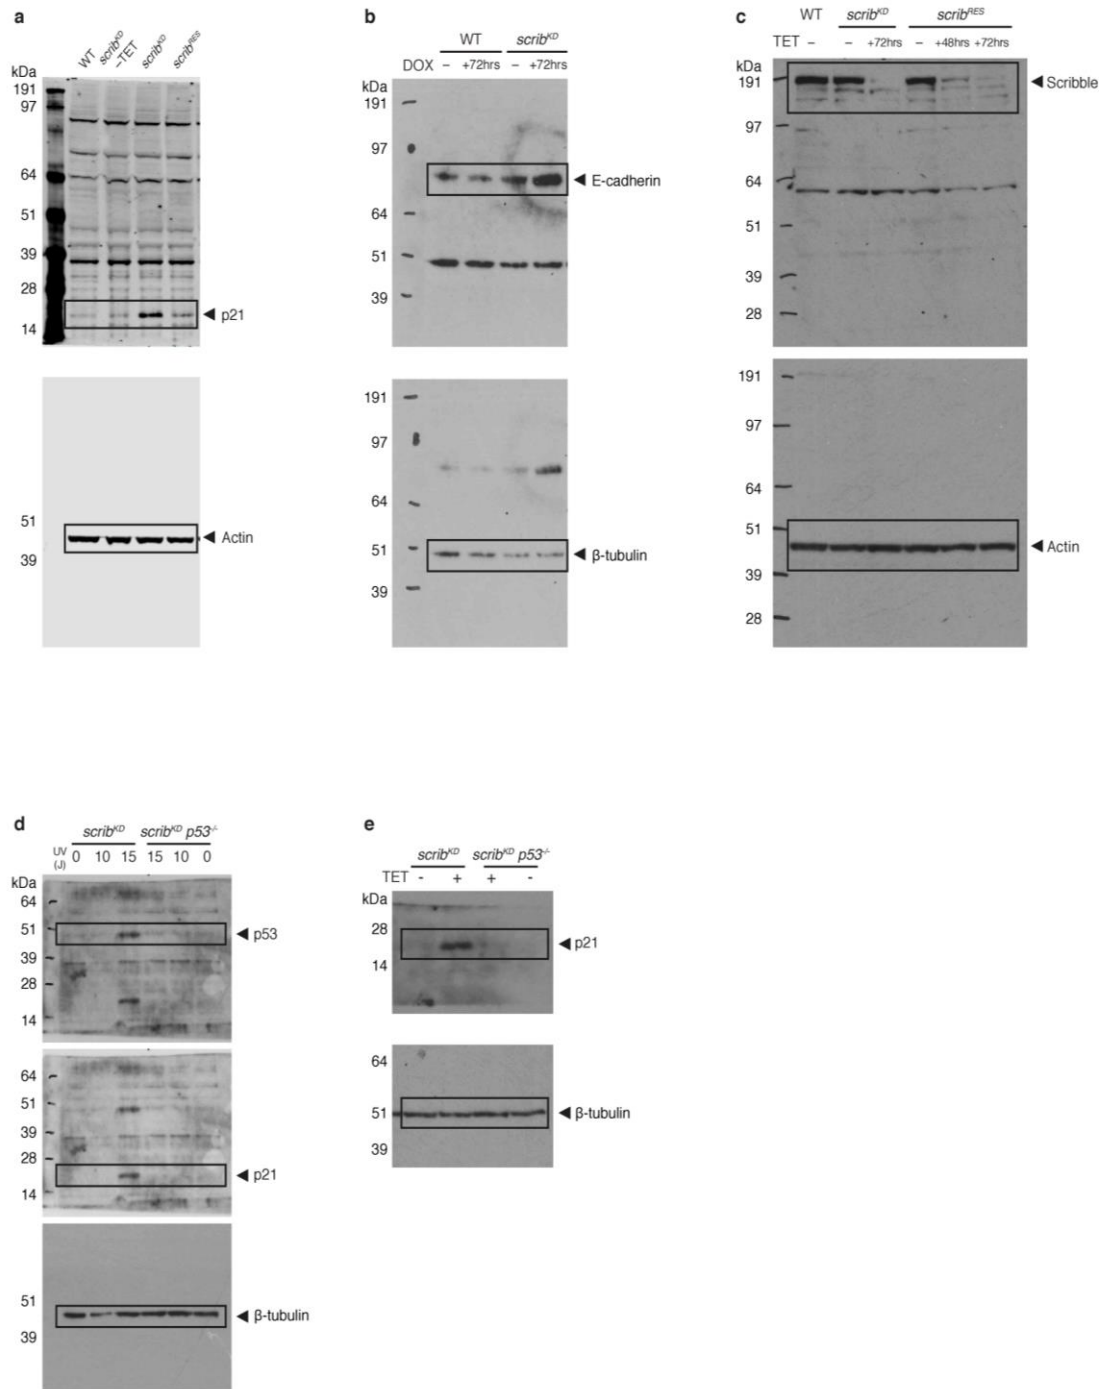

**Supplementary Fig. 9. Un-cropped original Western blots.**

**a**, Western blots showing p21 and loading control actin from Fig. 3b. **b**, Western blots showing E-cadherin and loading control  $\beta$ -tubulin from Supplementary Fig. 2f. **c**, Western blots showing Scribble and loading control actin from Supplementary Fig. 3a. **d**, Western blots showing p53, p21 and loading control  $\beta$ -tubulin from Supplementary Fig. 4b. **e**, Western blots showing p21 and loading control  $\beta$ -tubulin from Supplementary Fig. 4e. Black box represents the area of each blot used in each Figure.
