# Supplementary material for: Mechanical cell competition kills cells via induction of lethal p53 levels
Source: PubMed Central journal article supplement (PMC4848481; doi:10.1038/ncomms11373), 2016-04-25
Supplement: ncomms11373-s19.pdf [file ncomms11373-s19.pdf]

**Editorial Note:** this manuscript has been previously reviewed at another journal that is not operating a transparent peer review scheme. This document only contains reviewer comments and rebuttal letters for versions considered at Nature Communications.
